# Supplementary material for: Construction and validation of a PANoptosis-related lncRNA signature for predicting prognosis and targeted drug response in thyroid cancer
Source: PeerJ journal article supplement (doi:10.7717/peerj.15884), 2023-09-01
Supplement: GSE33630.zip [file GSE33630.zip]

## Sheet: Sheet1
GSE33630 GAPLINC
	GSM831749	ATC23	5.34967
	GSM831750	ATC24	5.36451
	GSM831751	ATC12	4.81606
	GSM831752	ATC13	7.19112
	GSM831753	ATC14	4.77935
	GSM831754	ATC15	5.70512
	GSM831755	ATC16	4.7031
	GSM831756	ATC17	6.10726
	GSM831757	ATC21	7.43924
	GSM831758	ATC22	5.35434
	GSM831759	1030T	4.00341
	GSM831760	103T	4.18114
	GSM831761	1053T	4.49763
	GSM831762	1144T	4.41193
	GSM831763	1175T	4.04686
	GSM831764	1190T	4.02852
	GSM831765	1208T	4.60705
	GSM831766	1224T	4.15782
	GSM831767	1243T	4.41796
	GSM831768	1247T	4.24816
	GSM831769	130T	4.23581
	GSM831770	1319T	5.26913
	GSM831771	1328T	4.30169
	GSM831772	1337T	6.0908
	GSM831773	1367T	4.34788
	GSM831774	1426T	4.13202
	GSM831775	144T	4.61054
	GSM831776	145T	4.29015
	GSM831777	147T	4.80515
	GSM831778	1486T	4.3814
	GSM831779	1502T	4.07429
	GSM831780	165T	4.465
	GSM831781	242T	5.03448
	GSM831782	243T	4.31081
	GSM831783	249T	4.17578
	GSM831784	307T	4.39385
	GSM831785	343T	4.57399
	GSM831786	366T	4.37641
	GSM831787	411T	4.11718
	GSM831788	446T	4.47746
	GSM831789	465T	4.60814
	GSM831790	501T	4.3824
	GSM831791	502T	4.47489
	GSM831792	515T	4.4397
	GSM831793	557T	4.07067
	GSM831794	574T	4.80923
	GSM831795	601T	4.4926
	GSM831796	607T	4.65785
	GSM831797	615T	4.09291
	GSM831798	686T	5.6736
	GSM831799	710T	4.69702
	GSM831800	752T	4.24593
	GSM831801	758T	4.05861
	GSM831802	771T	4.27739
	GSM831803	886T	4.30714
	GSM831804	905T	4.38904
	GSM831805	939T	4.12803
	GSM831806	954T	4.16626
	GSM831807	964T	4.834
	GSM831853	ATC11	9.66124
	GSM831808	1030N	3.89089
	GSM831809	103N	4.22611
	GSM831810	1053N	3.88644
	GSM831811	1144N	3.78554
	GSM831812	1175N	3.62171
	GSM831813	1190N	4.0549
	GSM831814	1208N	4.164
	GSM831815	1224N	3.78164
	GSM831816	1243N	3.98944
	GSM831817	1247N	3.92902
	GSM831818	130N	4.03095
	GSM831819	1319N	3.89034
	GSM831820	1328N	4.23402
	GSM831821	1337N	3.94905
	GSM831822	1367N	4.19142
	GSM831823	1426N	4.14454
	GSM831824	144N	4.32171
	GSM831825	145N	4.41837
	GSM831826	147N	4.51239
	GSM831827	1486N	4.01998
	GSM831828	1502N	3.92902
	GSM831829	165N	3.91985
	GSM831830	242N	4.54829
	GSM831831	243N	4.44675
	GSM831832	249N	4.43459
	GSM831833	307N	4.3145
	GSM831834	343N	3.70603
	GSM831835	366N	4.36643
	GSM831836	446N	4.27884
	GSM831837	501N	3.91069
	GSM831838	502N	4.40319
	GSM831839	515N	4.05489
	GSM831840	574N	4.22477
	GSM831841	601N	4.09307
	GSM831842	615N	4.21255
	GSM831843	686N	4.43714
	GSM831844	691N	4.47968
	GSM831845	710N	4.60208
	GSM831846	758N	4.2228
	GSM831847	771N	4.17719
	GSM831848	886N	4.23683
	GSM831849	905N	3.98127
	GSM831850	939N	4.41115
	GSM831851	954N	4.25962
	GSM831852	964N	4.08828

## Sheet: Sheet2
GSE33630 IDI2-AS1	GSM831749	ATC23	4.09696
	GSM831750	ATC24	3.96807
	GSM831751	ATC12	4.10736
	GSM831752	ATC13	4.79996
	GSM831753	ATC14	4.13536
	GSM831754	ATC15	4.71341
	GSM831755	ATC16	5.23744
	GSM831756	ATC17	5.52742
	GSM831757	ATC21	4.61836
	GSM831758	ATC22	4.65429
	GSM831759	1030T	4.03399
	GSM831760	103T	4.15038
	GSM831761	1053T	4.32275
	GSM831762	1144T	3.95924
	GSM831763	1175T	4.01195
	GSM831764	1190T	3.91398
	GSM831765	1208T	4.13225
	GSM831766	1224T	4.06635
	GSM831767	1243T	3.94808
	GSM831768	1247T	4.43334
	GSM831769	130T	4.09705
	GSM831770	1319T	3.75738
	GSM831771	1328T	3.89291
	GSM831772	1337T	4.03052
	GSM831773	1367T	4.25578
	GSM831774	1426T	4.2805
	GSM831775	144T	3.61976
	GSM831776	145T	4.07733
	GSM831777	147T	4.30685
	GSM831778	1486T	3.94789
	GSM831779	1502T	3.71147
	GSM831780	165T	4.06865
	GSM831781	242T	4.03472
	GSM831782	243T	3.87482
	GSM831783	249T	4.55992
	GSM831784	307T	4.23524
	GSM831785	343T	4.12856
	GSM831786	366T	3.91049
	GSM831787	411T	3.71527
	GSM831788	446T	3.81429
	GSM831789	465T	3.9534
	GSM831790	501T	4.08748
	GSM831791	502T	4.08729
	GSM831792	515T	4.15605
	GSM831793	557T	3.70071
	GSM831794	574T	4.12161
	GSM831795	601T	4.12546
	GSM831796	607T	3.67598
	GSM831797	615T	4.09384
	GSM831798	686T	3.63691
	GSM831799	710T	4.33567
	GSM831800	752T	3.94528
	GSM831801	758T	4.07372
	GSM831802	771T	4.00183
	GSM831803	886T	4.22553
	GSM831804	905T	4.16097
	GSM831805	939T	3.96612
	GSM831806	954T	3.85451
	GSM831807	964T	4.1801
	GSM831853	ATC11	4.53717
	GSM831808	1030N	4.73775
	GSM831809	103N	4.16851
	GSM831810	1053N	4.51158
	GSM831811	1144N	4.23782
	GSM831812	1175N	3.99997
	GSM831813	1190N	4.09918
	GSM831814	1208N	4.0419
	GSM831815	1224N	4.07312
	GSM831816	1243N	4.10005
	GSM831817	1247N	4.27317
	GSM831818	130N	4.36039
	GSM831819	1319N	3.6461
	GSM831820	1328N	4.37076
	GSM831821	1337N	4.63327
	GSM831822	1367N	4.12204
	GSM831823	1426N	4.69558
	GSM831824	144N	4.84867
	GSM831825	145N	4.4102
	GSM831826	147N	4.50283
	GSM831827	1486N	4.20244
	GSM831828	1502N	3.84106
	GSM831829	165N	4.33016
	GSM831830	242N	4.09352
	GSM831831	243N	4.18466
	GSM831832	249N	4.41447
	GSM831833	307N	4.23695
	GSM831834	343N	4.59149
	GSM831835	366N	4.29377
	GSM831836	446N	4.45149
	GSM831837	501N	4.21538
	GSM831838	502N	4.01175
	GSM831839	515N	4.07734
	GSM831840	574N	4.21867
	GSM831841	601N	4.24813
	GSM831842	615N	4.17074
	GSM831843	686N	4.17694
	GSM831844	691N	4.05832
	GSM831845	710N	4.02868
	GSM831846	758N	4.21139
	GSM831847	771N	4.48362
	GSM831848	886N	4.47621
	GSM831849	905N	4.81647
	GSM831850	939N	4.30251
	GSM831851	954N	4.37996
	GSM831852	964N	4.26093

## Sheet: Sheet3
GSE33630 RBPMS-AS1
	GSM831750	ATC23	6.05036
	GSM831751	ATC24	6.65655
	GSM831752	ATC12	5.9722
	GSM831753	ATC13	5.7958
	GSM831754	ATC14	5.17311
	GSM831755	ATC15	5.51434
	GSM831756	ATC16	5.46317
	GSM831757	ATC17	6.13735
	GSM831758	ATC21	5.23995
	GSM831759	ATC22	5.90029
	GSM831760	1030T	6.84548
	GSM831761	103T	6.92034
	GSM831762	1053T	7.15187
	GSM831763	1144T	6.48385
	GSM831764	1175T	7.69584
	GSM831765	1190T	5.71968
	GSM831766	1208T	7.41161
	GSM831767	1224T	6.16521
	GSM831768	1243T	6.01315
	GSM831769	1247T	7.04929
	GSM831770	130T	6.93964
	GSM831771	1319T	6.66232
	GSM831772	1328T	6.82744
	GSM831773	1337T	7.68688
	GSM831774	1367T	7.31042
	GSM831775	1426T	7.00647
	GSM831776	144T	6.94404
	GSM831777	145T	7.33865
	GSM831778	147T	6.89616
	GSM831779	1486T	7.34011
	GSM831780	1502T	7.61227
	GSM831781	165T	7.10175
	GSM831782	242T	6.69417
	GSM831783	243T	6.49099
	GSM831784	249T	7.9326
	GSM831785	307T	6.94784
	GSM831786	343T	7.10752
	GSM831787	366T	6.82585
	GSM831788	411T	5.60104
	GSM831789	446T	5.97093
	GSM831790	465T	6.91362
	GSM831791	501T	6.6135
	GSM831792	502T	7.49807
	GSM831793	515T	6.68126
	GSM831794	557T	7.19729
	GSM831795	574T	6.68907
	GSM831796	601T	7.54581
	GSM831797	607T	7.19845
	GSM831798	615T	6.25169
	GSM831799	686T	7.27368
	GSM831800	710T	6.93379
	GSM831801	752T	6.1178
	GSM831802	758T	7.27405
	GSM831803	771T	6.7281
	GSM831804	886T	6.70858
	GSM831805	905T	6.97244
	GSM831806	939T	7.32615
	GSM831807	954T	7.8026
	GSM831853	964T	7.31187
	GSM831808	ATC11	6.55809
	GSM831809	1030N	7.50329
	GSM831810	103N	7.91528
	GSM831811	1053N	8.40979
	GSM831812	1144N	7.50563
	GSM831813	1175N	8.31659
	GSM831814	1190N	7.85185
	GSM831815	1208N	8.56199
	GSM831816	1224N	8.0382
	GSM831817	1243N	7.60897
	GSM831818	1247N	7.93519
	GSM831819	130N	7.45812
	GSM831820	1319N	7.45671
	GSM831821	1328N	7.30952
	GSM831822	1337N	7.97244
	GSM831823	1367N	6.71271
	GSM831824	1426N	8.01371
	GSM831825	144N	8.09405
	GSM831826	145N	8.31343
	GSM831827	147N	8.60979
	GSM831828	1486N	8.01338
	GSM831829	1502N	7.77001
	GSM831830	165N	8.11672
	GSM831831	242N	8.11214
	GSM831832	243N	8.04982
	GSM831833	249N	7.83618
	GSM831834	307N	7.0162
	GSM831835	343N	7.46643
	GSM831836	366N	8.06523
	GSM831837	446N	8.00864
	GSM831838	501N	7.51516
	GSM831839	502N	8.47068
	GSM831840	515N	8.07112
	GSM831841	574N	8.39449
	GSM831842	601N	7.94035
	GSM831843	615N	7.70315
	GSM831844	686N	7.67718
	GSM831845	691N	7.64916
	GSM831846	710N	7.81183
	GSM831847	758N	7.79692
	GSM831848	771N	8.05567
	GSM831849	886N	6.85636
	GSM831850	905N	7.96145
	GSM831851	939N	8.57755
	GSM831852	954N	7.97552
	GSM831852	964N	7.41843
