# Supplementary material for: Construction and validation of a PANoptosis-related lncRNA signature for predicting prognosis and targeted drug response in thyroid cancer
Source: PeerJ. 2023 Sep 1;11:e15884. doi: 10.7717/peerj.15884 (PMC10476615; doi:10.7717/peerj.15884)
Supplement: Supplemental Information 4 [file peerj-11-15884-s004.xlsx]

## Sheet: Sheet1
title	Gene/Regulator	PMID
Interferon regulatory factor 1 regulates PANoptosis to prevent colorectal cancer	Interferon regulatory factor 1(IRF1)	32554929
IRF1 Is a Transcriptional Regulator of ZBP1 Promoting NLRP3 Inflammasome Activation and Cell Death during Influenza Virus Infection	IRF1	29321274
ZBP1/DAI is an innate sensor of influenza virus triggering the NLRP3 inflammasome and programmed cell death pathways	ZBP1(DAI)	27917412
ZBP1 promotes fungi-induced inflammasome activation and pyroptosis, apoptosis, and necroptosis (PANoptosis)	the Zα2 domain of ZBP1, ZBP1	33109609
The Zα2 domain of ZBP1 is a molecular switch regulating influenza-induced PANoptosis and perinatal lethality during development	the Zα2 domain of ZBP1	32350114
Inflammatory Cell Death, PANoptosis, Mediated by Cytokines in Diverse Cancer Lineages Inhibits Tumor Growth	TNF-α and IFN-γ, caspase-8	34290111
Synergism of TNF-α and IFN-γ Triggers Inflammatory Cell Death, Tissue Damage, and Mortality in SARS-CoV-2 Infection and Cytokine Shock Syndromes	TNF-α, IFN-γ	33278357
Caspase-6 Is a Key Regulator of Innate Immunity, Inflammasome Activation, and Host Defense	Caspase-6	32298652
AIM2 forms a complex with pyrin and ZBP1 to drive PANoptosis and host defence	AIM2	344712​​87
A new cell death program regulated by toll-like receptor 9 through p38 mitogen-activated protein kinase signaling pathway in a neonatal rat model with sepsis associated encephalopathy	TLR9	35261352
Impaired NLRP3 inflammasome activation/pyroptosis leads to robust inflammatory cell death via caspase-8/RIPK3 during coronavirus infection	NLRP3	32763970
Identification of the PANoptosome: A Molecular Platform Triggering Pyroptosis, Apoptosis, and Necroptosis (PANoptosis)	RIPK1, RIPK3, CASP8, NLRP3, ASC, and FADD	32547960
The regulation of the ZBP1-NLRP3 inflammasome and its implications in pyroptosis, apoptosis, and necroptosis (PANoptosis)	ZBP1-NLRP3, Z-RNA	32729116
PANoptosis components, regulation, and implications	TAK1	32575071
ZBP1/DAI ubiquitination and sensing of influenza vRNPs activate programmed cell death	retinoic acid inducible gene I (RIG-I) ZBP1	28634194
MiR-29a-3p Improves Acute Lung Injury by Reducing Alveolar Epithelial Cell PANoptosis	MiR-29a-3p, ZBP1, gasdermin D, caspase-3, caspase-8, and MLKL	35656115
PANoptosis in Viral Infection: The Missing Puzzle Piece in the Cell Death Field	caspase-8，RIPK1，RIPK3，ZBP1，ASC ，caspase-6，FADD，caspase-1	34537233
Coronaviruses: Innate Immunity, Inflammasome Activation, Inflammatory Cell Death, and Cytokines	caspase-1，ASC	33153908
Programming inflammatory cell death for therapy	ASC，Caspase-8 ，Caspase-1，RIPK1，RIPK3，ZBP1	34619283
PANoptosis-like cell death in ischemia/reperfusion injury of retinal neurons	caspase-1、caspase-8	35900430
PANoptosis: A New Insight Into Oral Infectious Diseases	ZBP1, NLRP3, RIPK1, TAK1,RIPK3, caspase-1, and caspase-8, AIM2, pyrin,TNF-α and IFN-γ, caspase-8/FADD	34970269
The PANoptosome: A Deadly Protein Complex Driving Pyroptosis, Apoptosis, and Necroptosis (PANoptosis)	PANoptosome, ZBP1, RIPK3, CASP8, RIPK1, RIPK3-MLKL,CASP1,CASP8, TAK1,CASP6	32582562
PANoptosis in microbial infection	TAK1, ZBP1, RIPK3, caspase-6, RIPK1,caspase-8, NleB and NleF, EspL, NFADD,TRADD,	32829024
Do pyroptosis, apoptosis, and necroptosis (PANoptosis) exist in cerebral ischemia? Evidence from cell and rodent studies	TAK1, ZBP1, NLRP1, NLRP3, NLRP4, FADD, RIP1,RIP3	35017436
From pyroptosis, apoptosis and necroptosis to PANoptosis: A mechanistic compendium of programmed cell death pathways	ZBP1, CASP6, RIPK1, RIPK3, TRIF, RIG-I, ASC	34504660
It's All in the PAN: Crosstalk, Plasticity, Redundancies, Switches, and Interconnectedness Encompassed by PANoptosis Underlying the Totality of Cell Death-Associated Biological Effects	ZBP1, AIM2, IRF1, NLRP3, ASC, CASP1, CASP6, CASP8, RIPK3, RIPK1, FADD Fadd Combined Ripk3, Casp8 Combined Ripk3	35563804
Caspase-8: A key protein of cross-talk signal way in PANoptosis in cancer	caspase-8, RIPK1, ASC, IRF1, ZAP1, FADD, FADD, NLRP3, RIPK3, caspase-6	34028029
Programmed Cell Death Tunes Tumor Immunity	caspase-1, GSDMD, GSDME、caspase-8, caspase-3, FADD、RIPK3, MLKL、IFNγ、TNFα、ZBP1、RIPK3、IRF1	35432318
Role of inflammasomes/pyroptosis and PANoptosis during fungal infection	ZBP1、caspase-1、caspase-8、caspase-3、caspase-7	33735255
Hierarchical Cell Death Program Disrupts the Intracellular Niche Required for Burkholderia thailandensis Pathogenesis	ZBP1、RIPK1、TAK1	34154417
Advances in Understanding Activation and Function of the NLRC4 Inflammasome	caspase-8、Asc、RIPK1、NLRP3、ZBP1、NLRC4	33494299
Updating the NLRC4 Inflammasome: from Bacterial Infections to Autoimmunity and Cancer	NAIP, NLRC4	34276697
The innate immune system and cell death in autoinflammatory and autoimmune disease	NLRP3、ASC、caspase-1、caspase-8、RIPK3、RIPK1、ZBP1、TAK1、TBK1、TLR、TNFR1	33242752
Nod-like Receptors: Critical Intracellular Sensors for Host Protection and Cell Death in Microbial and Parasitic Infections	caspase 8，NLRP3，ZBP1 ，ASC，RIPK3，CASP6	34768828
Coronavirus Infection-Associated Cell Death Signaling and Potential Therapeutic Targets	TNF-α，IFN-γ	34946543
Innate immunity: the first line of defense against SARS-CoV-2	TNF ，IFN-γ ， caspase-8	35105981
TAK1 restricts spontaneous NLRP3 activation and cell death to control myeloid proliferation	TGF-β activated kinase-1(TAK1)	29500178
ZBP1 and TAK1: Master Regulators of NLRP3 Inflammasome/Pyroptosis, Apoptosis, and Necroptosis (PAN-optosis)	TAK1	31850239
Innate immune priming in the absence of TAK1 drives RIPK1 kinase activity-independent pyroptosis, apoptosis, necroptosis, and inflammatory disease	TAK1、RIPK1 kinase	31869420
Caspase-8 is the molecular switch for apoptosis, necroptosis and pyroptosis	caspase-8	31748744
Activity of caspase-8 determines plasticity between cell death pathways	caspase-8	31723262
NLRC4 Deficiency Leads to Enhanced Phosphorylation of MLKL and Necroptosis	NLRC4	35301258
RIPK1 Distinctly Regulates Yersinia-Induced Inflammatory Cell Death, PANoptosis	RIPK1	33310881
ADAR1 restricts ZBP1-mediated immune response and PANoptosis to promote tumorigenesis	Adenosine deaminase acting on RNA 1(ADAR1)	34686350
Phosphorylated NFS1 weakens oxaliplatin-based chemosensitivity of colorectal cancer by preventing PANoptosis	phosphorylated NFS1	35221331
