# Supplementary material for: Construction and validation of a PANoptosis-related lncRNA signature for predicting prognosis and targeted drug response in thyroid cancer
Source: PeerJ. 2023 Sep 1;11:e15884. doi: 10.7717/peerj.15884 (PMC10476615; doi:10.7717/peerj.15884)
Supplement: Supplemental Information 7 [file peerj-11-15884-s007.xlsx]

## Sheet: Sheet1
Order	Primer	5 to 3
1	GAPLINC_F	ACACACAGCAGCCTGGTTTC
2	GAPLINC_R	ATGGCACAATCAGGGCTCTT
3	IDI2-AS1_F	GTGTTAAACAAGACAACGCTGAA
4	IDI2-AS1_R	AAGAGCGCTGGAAAAACCTT
5	LINC02154_F	GAATTCGAGATCTGATGGTTTTATAAAG
6	LINC02154_R	GGATCCTGGCAGTTCAGGTTTTAATGGA
7	RBPMS-AS1_F	TGGAGTTACGCAATTTGGGG
8	RBPMS-AS1_R	GAGAAGGAGAACACCCCGAG
