# Supplementary material for: Construction and validation of a PANoptosis-related lncRNA signature for predicting prognosis and targeted drug response in thyroid cancer
Source: PeerJ. 2023 Sep 1;11:e15884. doi: 10.7717/peerj.15884 (PMC10476615; doi:10.7717/peerj.15884)
Supplement: Supplemental Information 13 [file peerj-11-15884-s013.xlsx]

## Sheet: Sheet1
CT
		Actin			GAPLINC			IDI2-AS1			LINC02154			RBPMS-AS1
1	tumor	17.71	18.18	17.52	29.78	30.32	30.76	N/A	36.63	36.23	36.31	N/A	36.64	34.07	34.32	34.42
	para-tumor	19.27	19.54	19.2	34.11	33.75	33.04	37.29	37.81	37.63	38.86	38.45	N/A	32.27	32.57	33.22
2	tumor	20.11	20.35	20.8	33.04	33.79	32.8	36.11	36.87	N/A	36.33	36.45	37.43	35.36	36.22	34.64
	para-tumor	19.01	18.85	19.42	32.69	33.3	35.52	34.95	35.23	N/A	38.43	N/A	38.12	32.71	33.19	32.5
3	tumor	19.92	20.5	19.82	32.86	32.22	33.63	37.22	37.23	37.96	35.33	35.95	35.37	32.85	32.77	33.13
	para-tumor	18.32	18.94	18.9	33.15	32.9	33.7	35.24	35.13	N/A	37.07	N/A	37.67	31.81	32.71	31.99
4	tumor	18.63	19.1	18.94	33	32.77	33.39	37.24	N/A	37.04	35.33	35.95	35.37	34.47	34.83	34.63
	para-tumor	19.14	19.26	19.09	33.23	33.09	34.66	35.93	35.46	35.87	37.5	37.75	36.4	33.24	32.47	32.46
5	tumor	18.39	18.38	18.62	28.99	29.15	29.73	37.52	37.61	37.63	36.15	36.42	35.86	36.53	36.3	36.21
	para-tumor	19.75	20.03	19.84	32.98	33.08	32.66	34.68	34.25	34.11	37.36	37.12	N/A	33.53	33.52	34.17
6	tumor	19.22	19.11	19.34	30.27	30.22	30.2	37.48	36.66	N/A	34.67	34.92	34.47	34.39	33.48	33.97
	para-tumor	19.74	19.63	19.63	33.84	33.62	33.14	33.15	33.02	N/A	N/A	37.63	38.09	31.61	31.51	32.48
7	tumor	23.35	22.91	22.89	33.02	32.62	32.45	34.07	34.32	34.42	32.02	32.62	32.45	36.09	N/A	36.26
	para-tumor	25.01	24.47	23.76	32.62	33.85	33.07	32.27	32.57	33.22	33.62	33.85	33.07	34.69	35.02	34.12
8	tumor	24.63	23.86	24.3	29.44	29.53	29.31	35.36	36.22	34.64	35.43	35.64	35.12	37.43	37.64	37.12
	para-tumor	24.87	24.4	25.01	32.19	32.2	30.51	32.71	33.19	32.5	36.61	36.7	N/A	N/A	36.7	36.41
9	tumor	18.63	18.91	18.58	31.87	30.85	30.91	32.85	32.77	33.13	33.42	34.03	33.9	35.52	34.37	35.18
	para-tumor	20.19	20.34	20.41	30.58	30.58	30.13	31.81	32.71	31.99	35.52	34.37	35.18	33.42	33.03	33.9
10	tumor	20.07	20.07	20	30.82	29.66	29.87	34.47	34.83	34.63	33.82	33.62	32.4	35.29	36.7	35.11
	para-tumor	21.67	21.73	21.29	30.47	30.45	30.65	33.24	32.47	32.46	35.29	36.7	35.11	33.82	33.62	32.4
