# Supplementary material for: Construction and validation of a PANoptosis-related lncRNA signature for predicting prognosis and targeted drug response in thyroid cancer
Source: PeerJ. 2023 Sep 1;11:e15884. doi: 10.7717/peerj.15884 (PMC10476615; doi:10.7717/peerj.15884)
Supplement: Supplemental Information 14 [file peerj-11-15884-s014.xlsx]

## Sheet: Sheet1
BHP10-3
	NC	OE
actin	17.27	17.15
	17.31	17.58
	16.95	17.13
RBPMS-AS1	26.22	25.12
	26.57	24.81
	26.37	24.72
	17.27	17.15
	17.31	17.58
	16.95	17.13
	17.1767	17.2867
	26.22	25.12
	26.57	24.81
	26.37	24.72
ΔCt	9.04333	7.83333
	9.39333	7.52333
	9.19333	7.43333
	9.21					1.12246			1.12246	0.880666	1.01162
						0.880666			2.59668	3.21912	3.42634
ΔΔCt	-0.166667	-1.37667				1.01162
	0.183333	-1.68667					2.59668
	-0.0166667	-1.77667					3.21912
							3.42634
2−ΔCt	1.12246	2.59668
	0.880666	3.21912
	1.01162	3.42634
	NC	RBPMS-AS1
TPC-1
	Ct		Actin			RBPMS-AS1
		NC	13.74	13.92	12	24.15	23.95	23.61
		OE	12.77	13.06	12.95	20.75	20.77	20.89
												ΔCt					ΔΔCt				2−ΔCt
				13.74	13.92	13.83			24.15	23.95	23.61	24.15	23.95	23.61	23.9033		24.15	23.95	23.61		0.842842	0.968171	1.22547
				12.77	13.06	12.95	12.9267		20.75	20.77	20.89	20.75	20.77	20.89			20.75	20.77	20.89		4.75683	4.69134	4.31691
