# Supplementary material for: Construction and validation of a PANoptosis-related lncRNA signature for predicting prognosis and targeted drug response in thyroid cancer
Source: PeerJ journal article supplement (doi:10.7717/peerj.15884), 2023-09-01
Supplement: Wound_healing.zip [file Wound_healing.zip]

## Sheet: Sheet1
BHP10-3													wound healing area(％）
	0h						24h
NC		Area	Mean	Min	Max			Area	Mean	Min	Max
	1	478028	15.83	0	255		1	299024	16.803	0	255		37.4463
	2	491577	195.614	0	255		2	291095	10.189	0	255		40.7834
	3	465034	13.869	0	255		3	292008	11.448	0	255		37.2072
RBPMS-AS1	0h						24h
		Area	Mean	Min	Max			Area	Mean	Min	Max
	1	495497	5.632	0	255		1	456070	5.25	0	255		7.95706
	2	493398	6.694	0	255		2	469861	13.117	0	255		4.77039
	3	480493	3.313	0	255		3	457933	9.493	0	255		4.69518
TPC-1													wound healing area(％）
	0h						24h
NC		Area	Mean	Min	Max			Area	Mean	Min	Max
	1	470731	9.781	0	255		1	280622	5.027	0	255		40.3859
	2	470541	3.751	0	255		2	281742	50.99	0	255		40.1238
	3	464894	6.573	0	255		3	288969	3.494	0	255		37.842
	0h						24h
RBPMS-AS1		Area	Mean	Min	Max			Area	Mean	Min	Max
	1	462759	37.717	0	255		1	315179	4.667	0	255		31.8913
	2	448795	16.394	0	255		2	300418	4.208	0	255		33.0612
	3	458083	1.053	0	255		3	319056	5.612	0	255		30.3497
