# Supplementary figures and images for: Construction and validation of a PANoptosis-related lncRNA signature for predicting prognosis and targeted drug response in thyroid cancer
Source: PeerJ journal article supplement (doi:10.7717/peerj.15884), 2023-09-01

Sensitivity

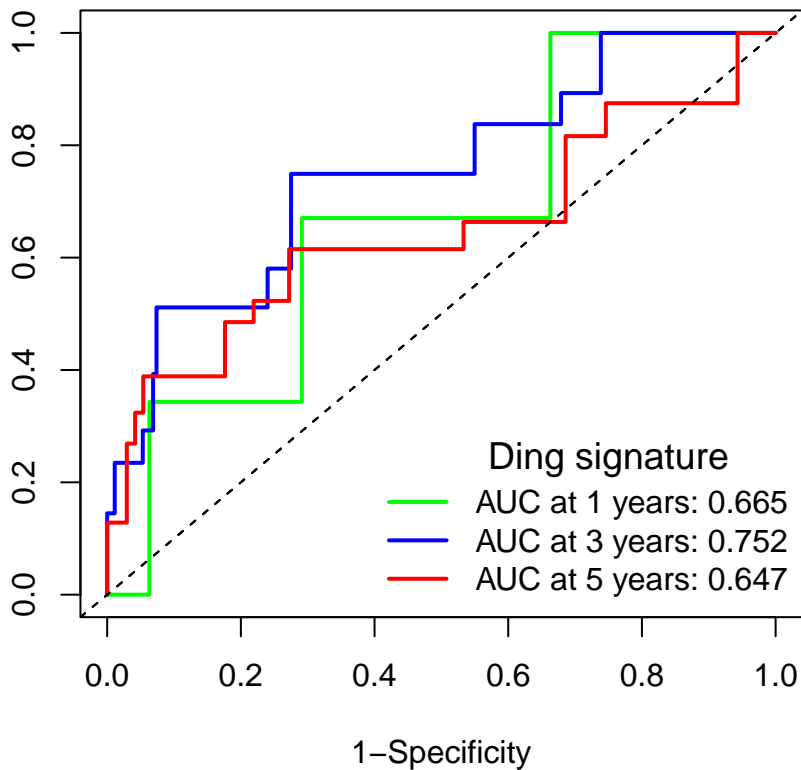

Supplement: raw_data_of_model_comparison.zip [file raw_data_of_model_comparison.zip]

# Qin signature2

Risk    + High risk    + Low risk

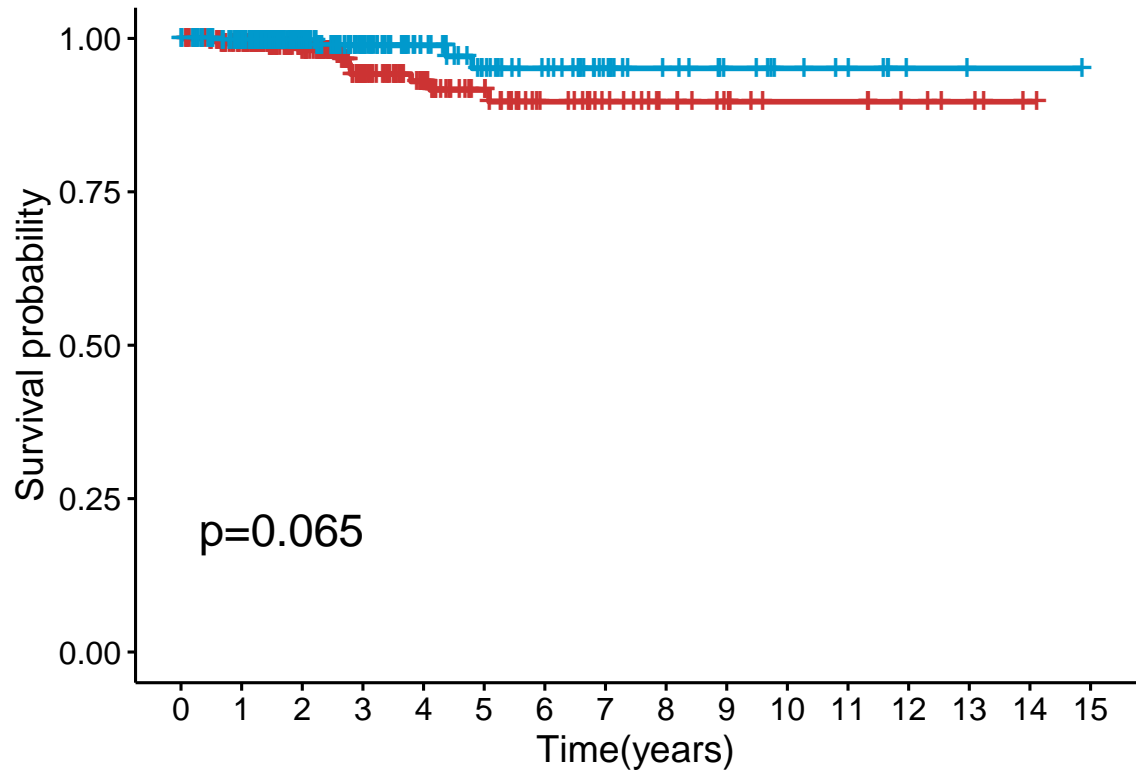

Supplement: raw_data_of_model_comparison.zip [file raw_data_of_model_comparison.zip]

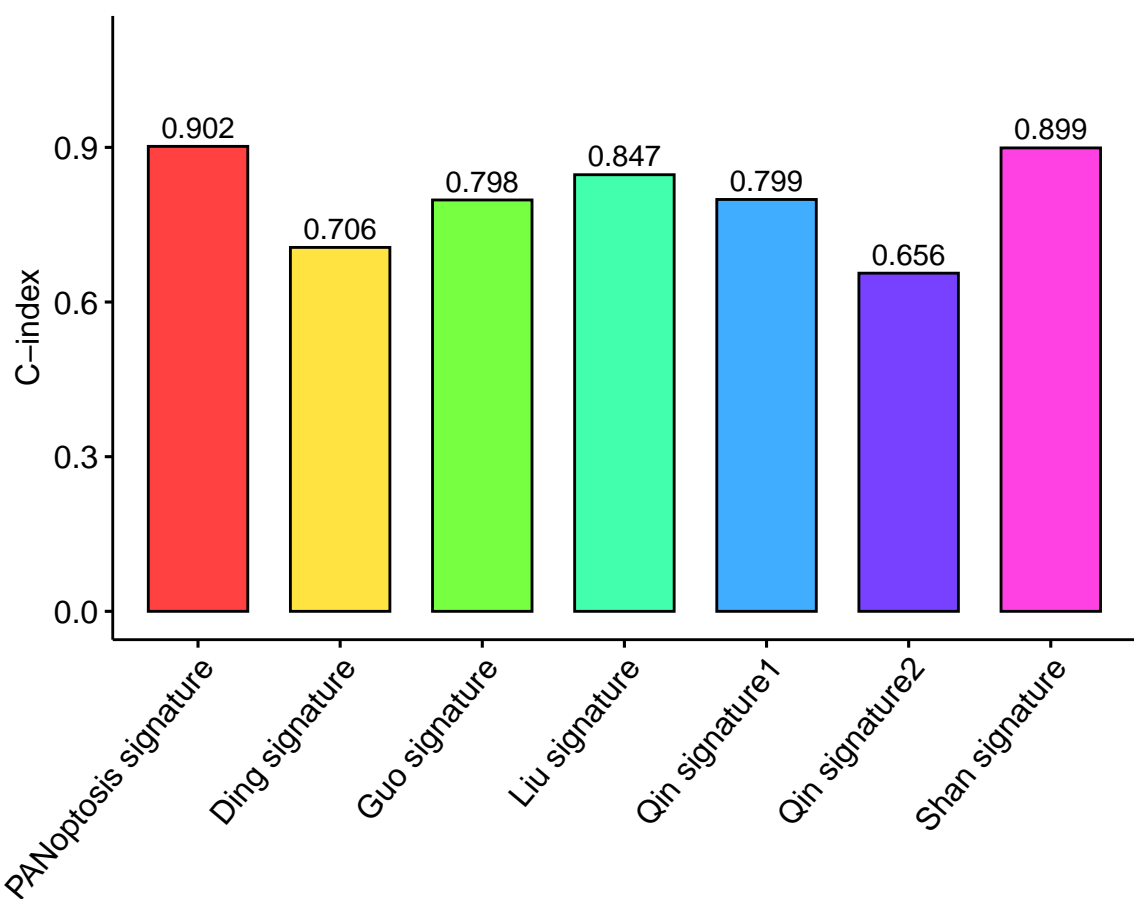

Supplement: raw_data_of_model_comparison.zip [file raw_data_of_model_comparison.zip]

# PANoptosis signature

Risk    + High risk    + Low risk

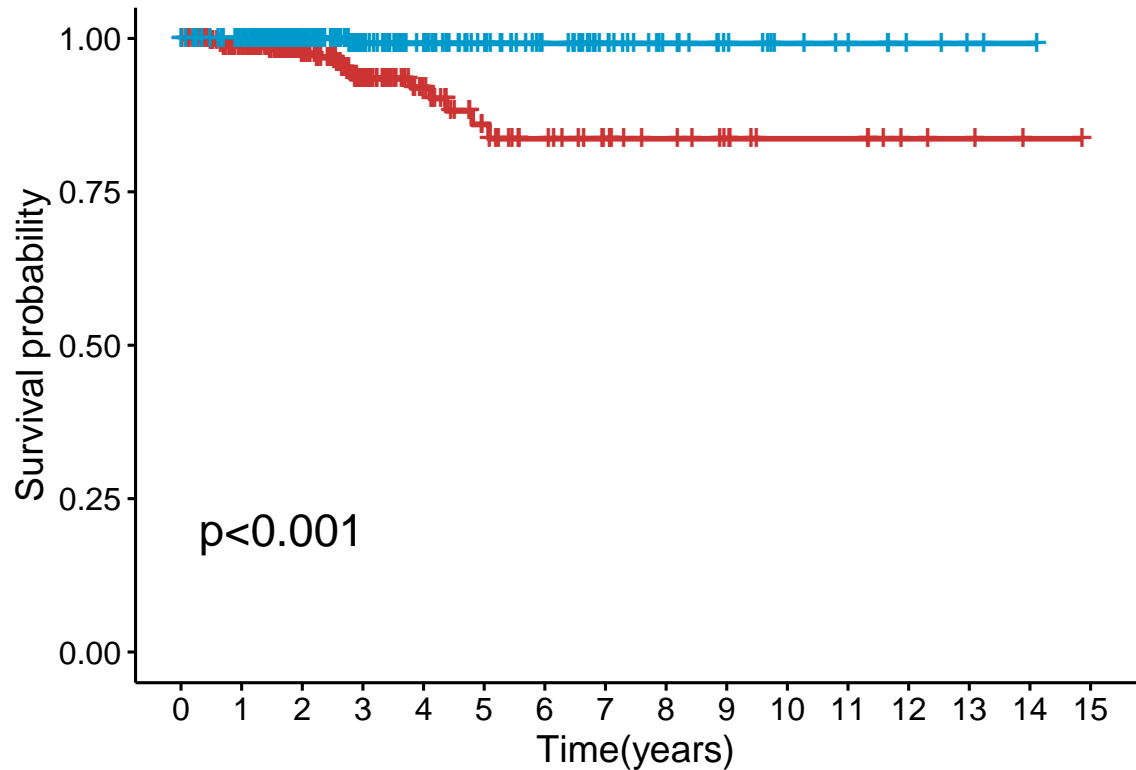

Supplement: raw_data_of_model_comparison.zip [file raw_data_of_model_comparison.zip]

# Liu signature

Risk    + High risk    + Low risk

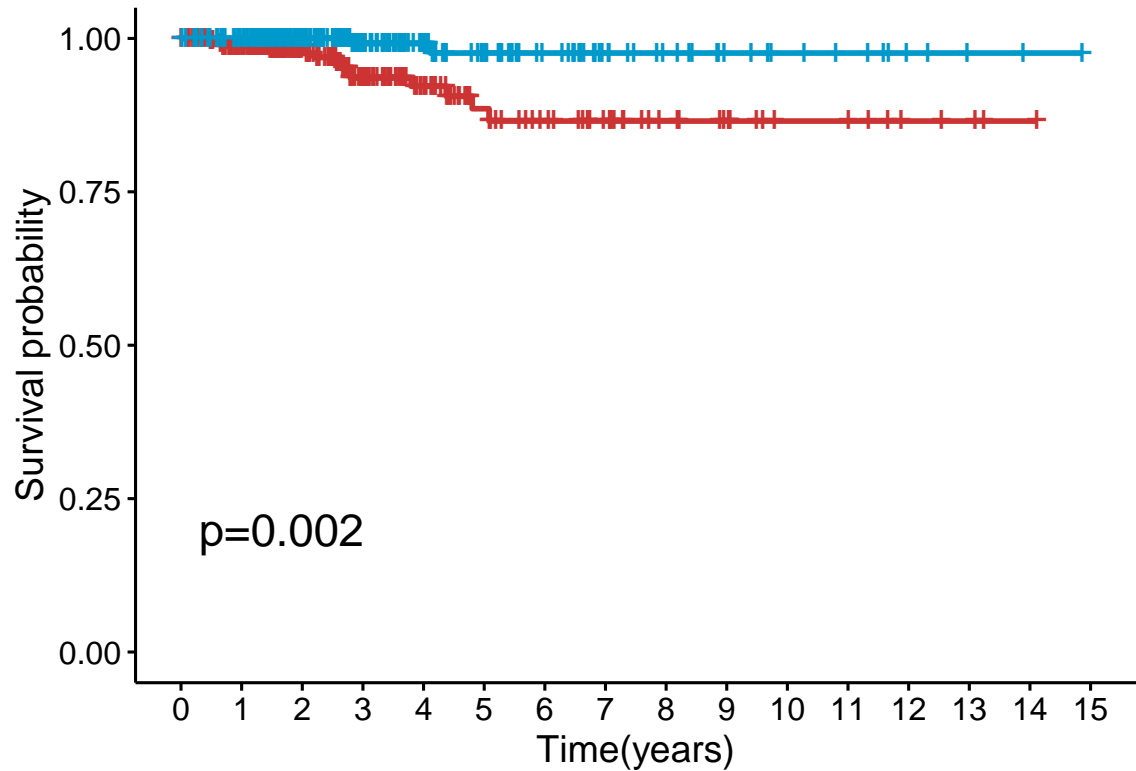

Supplement: raw_data_of_model_comparison.zip [file raw_data_of_model_comparison.zip]

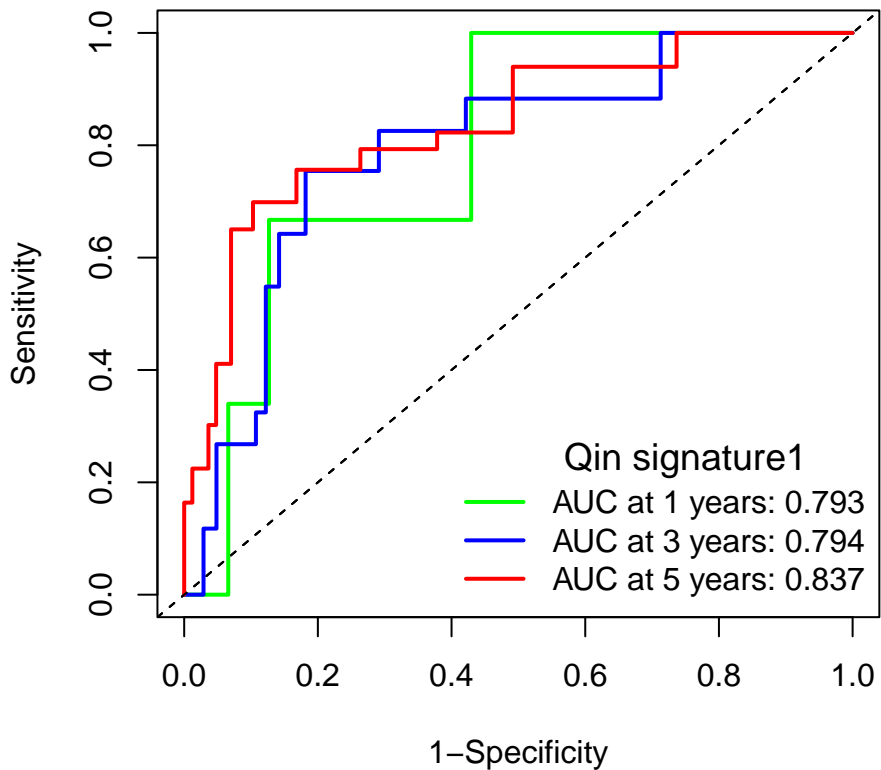

Supplement: raw_data_of_model_comparison.zip [file raw_data_of_model_comparison.zip]

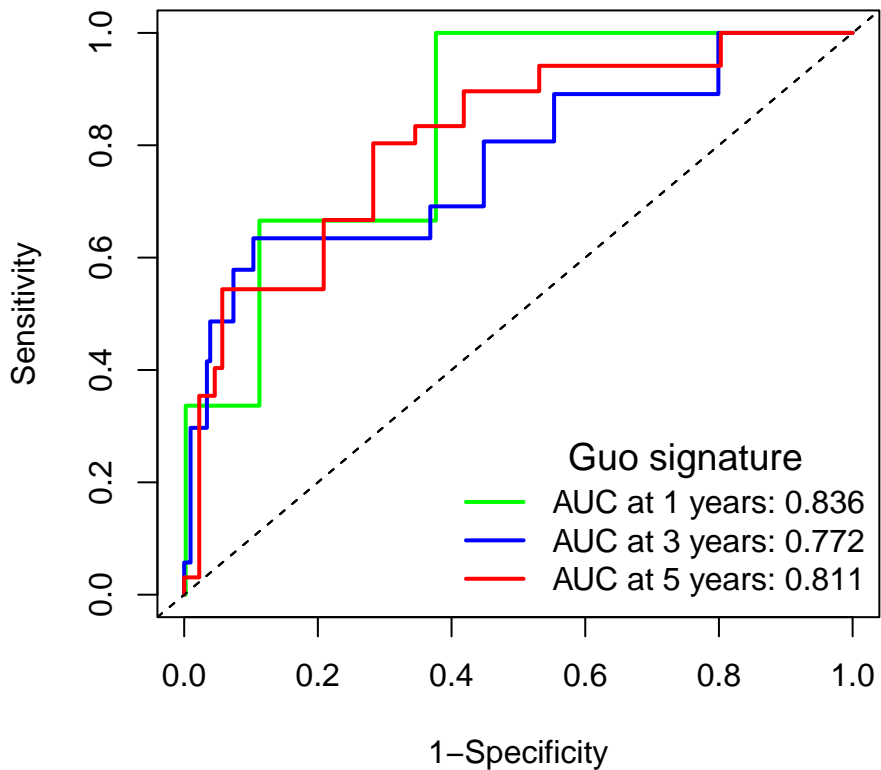

Supplement: raw_data_of_model_comparison.zip [file raw_data_of_model_comparison.zip]

# Shan signature

Risk    + High risk    + Low risk

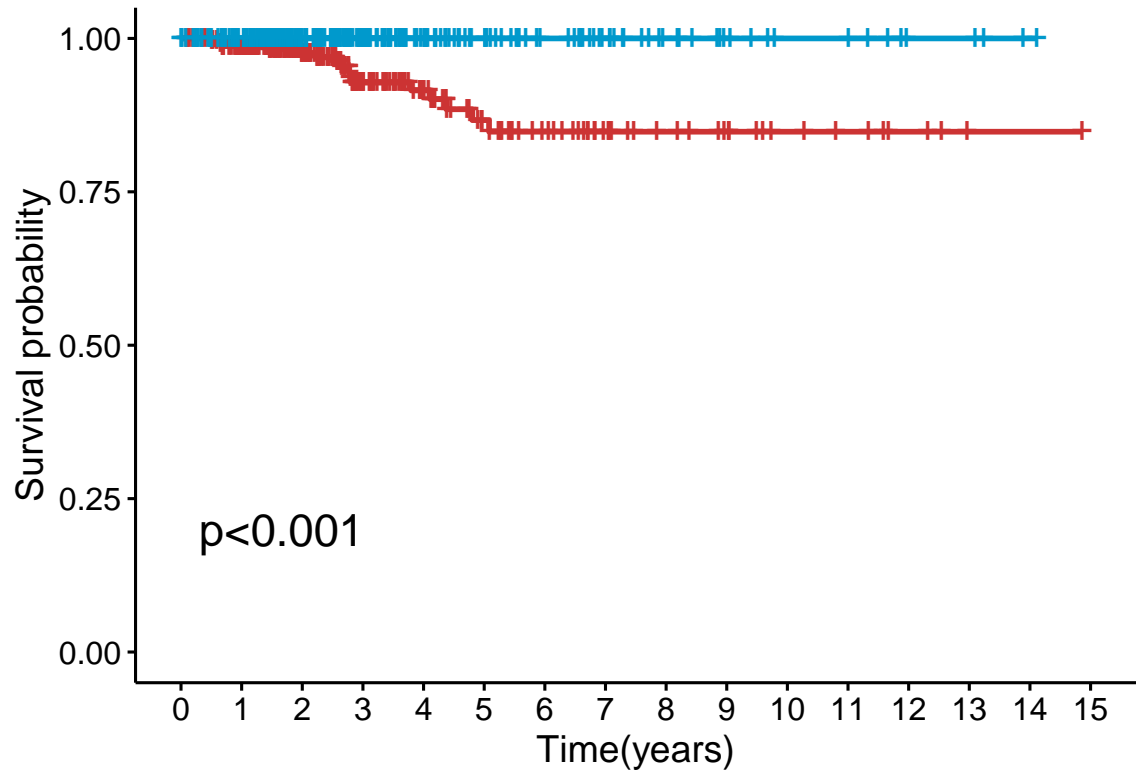

Supplement: raw_data_of_model_comparison.zip [file raw_data_of_model_comparison.zip]

Sensitivity

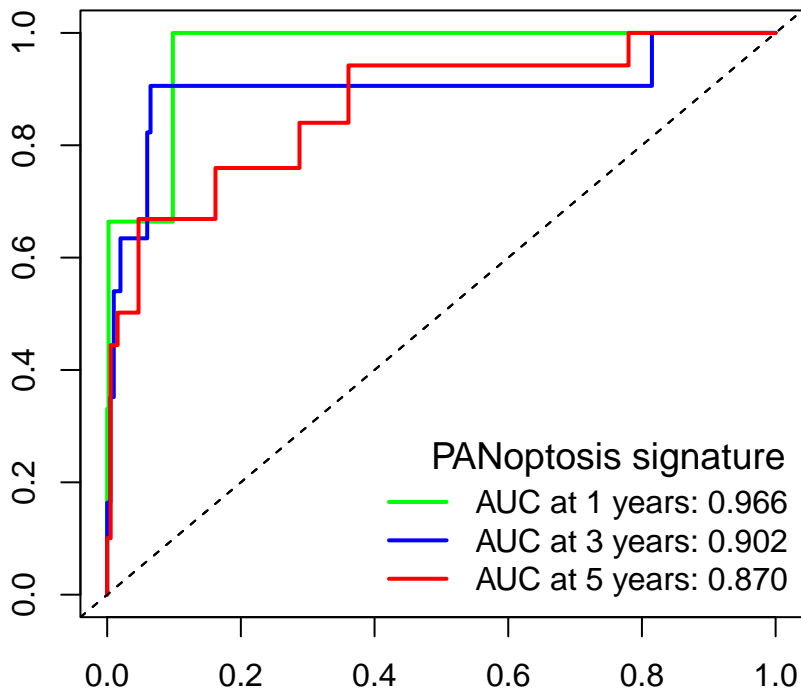

PANoptosis signature

— AUC at 1 years: 0.966

— AUC at 3 years: 0.902

— AUC at 5 years: 0.870

1-Specificity

Supplement: raw_data_of_model_comparison.zip [file raw_data_of_model_comparison.zip]

Sensitivity

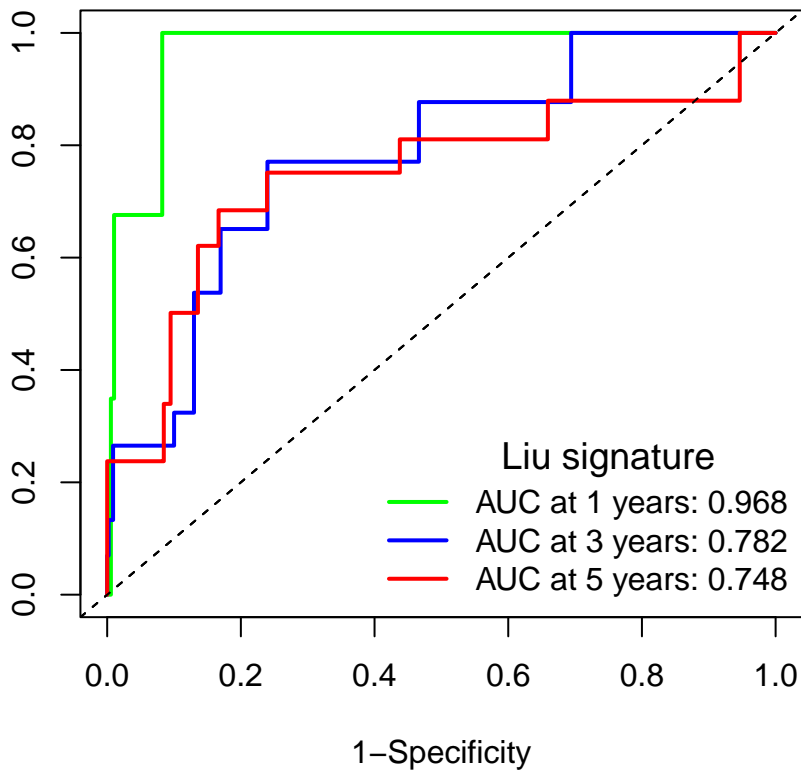

Supplement: raw_data_of_model_comparison.zip [file raw_data_of_model_comparison.zip]

Sensitivity

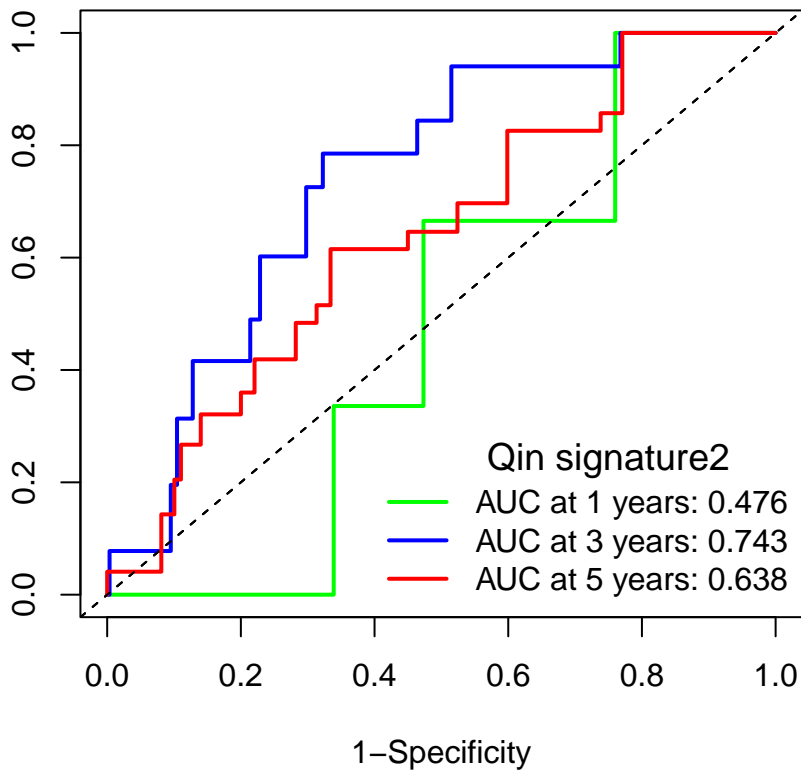

Supplement: raw_data_of_model_comparison.zip [file raw_data_of_model_comparison.zip]

# Guo signature

Risk    + High risk    + Low risk

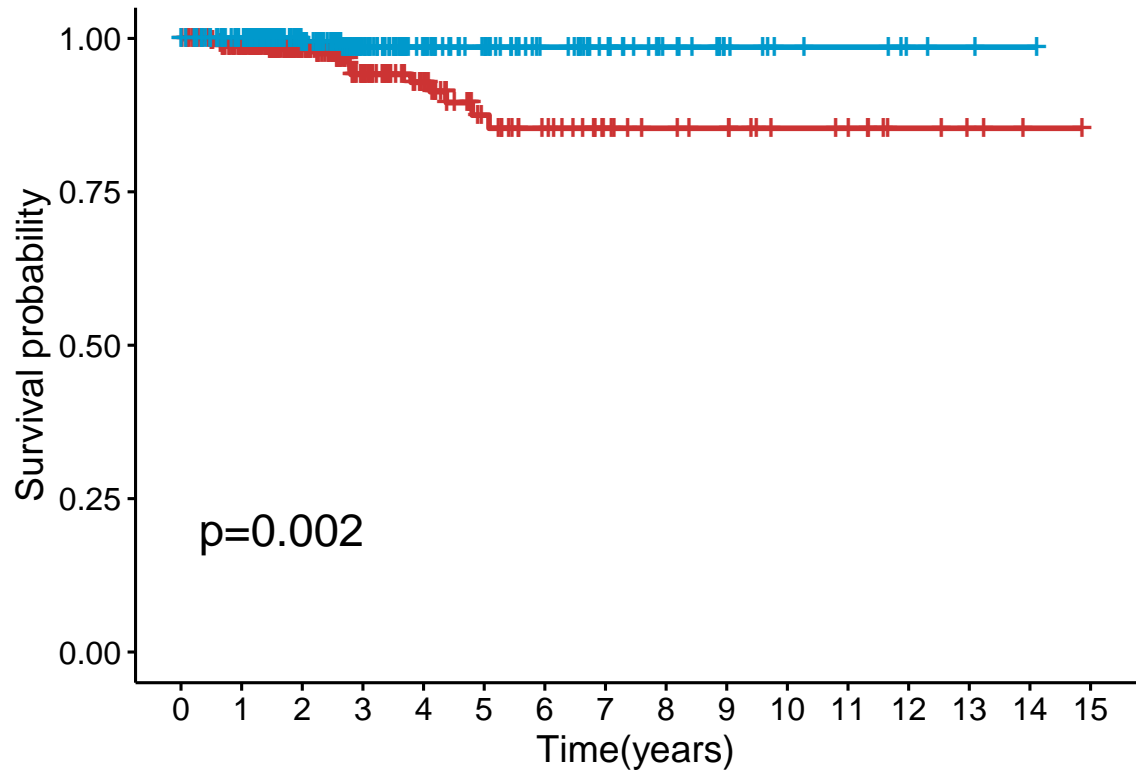

Supplement: raw_data_of_model_comparison.zip [file raw_data_of_model_comparison.zip]

Sensitivity

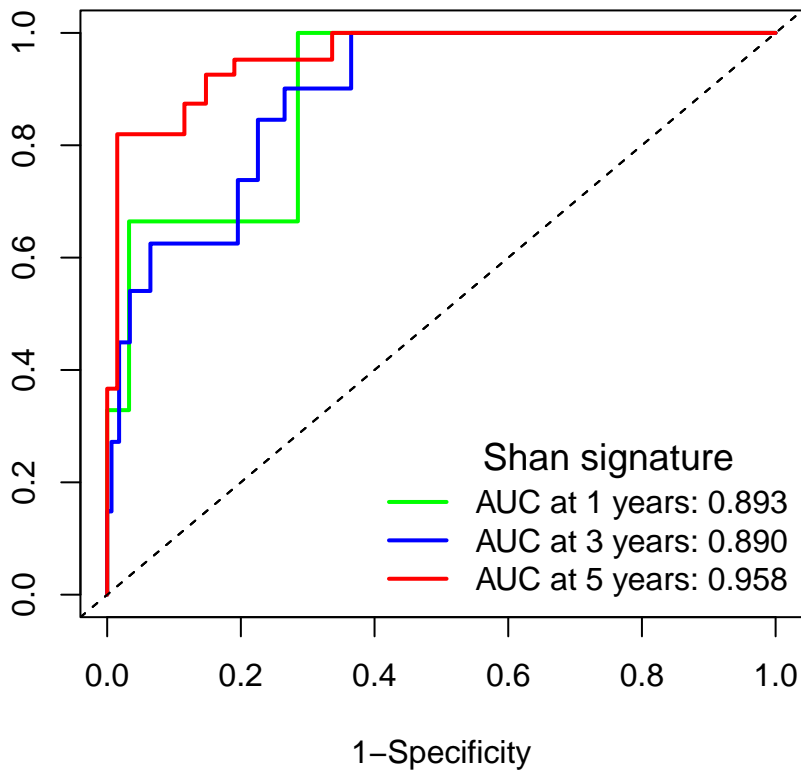

Supplement: raw_data_of_model_comparison.zip [file raw_data_of_model_comparison.zip]

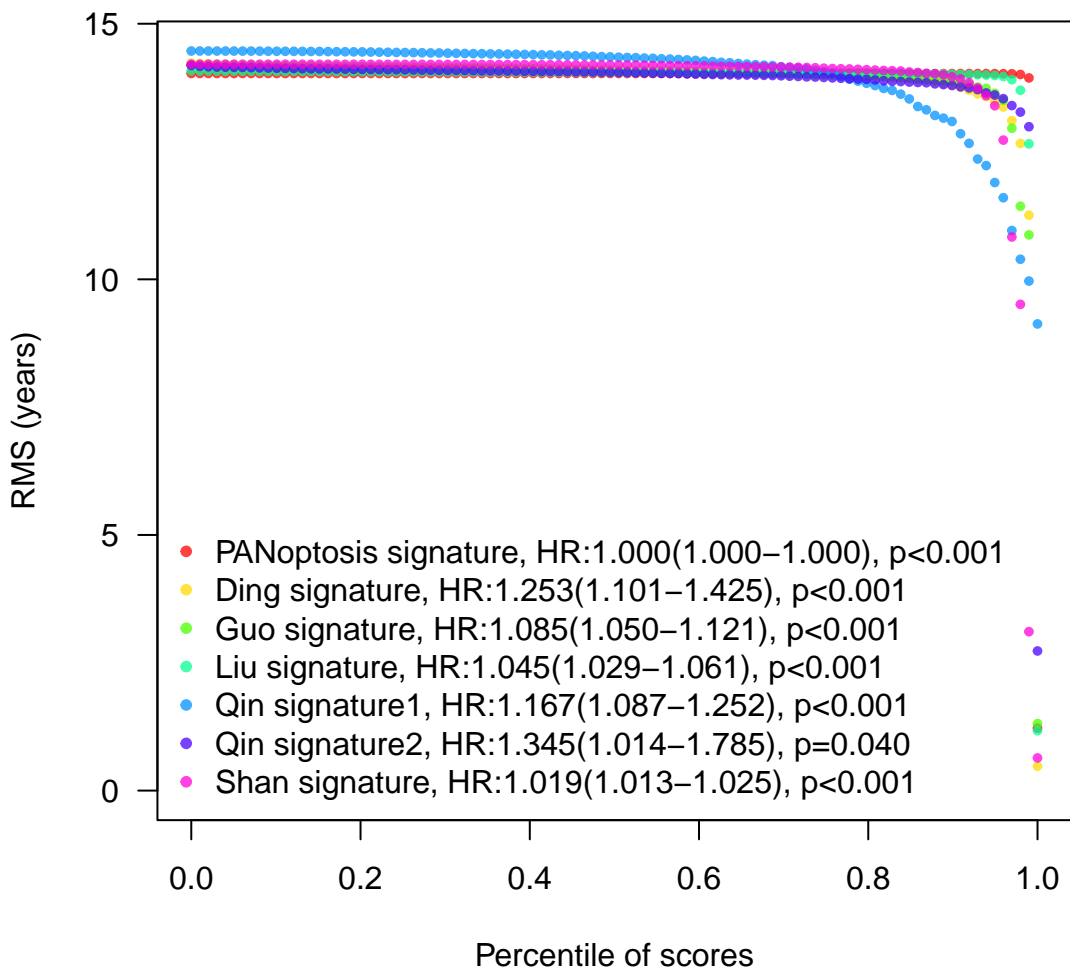

Supplement: raw_data_of_model_comparison.zip [file raw_data_of_model_comparison.zip]

# Qin signature1

Risk    + High risk    + Low risk

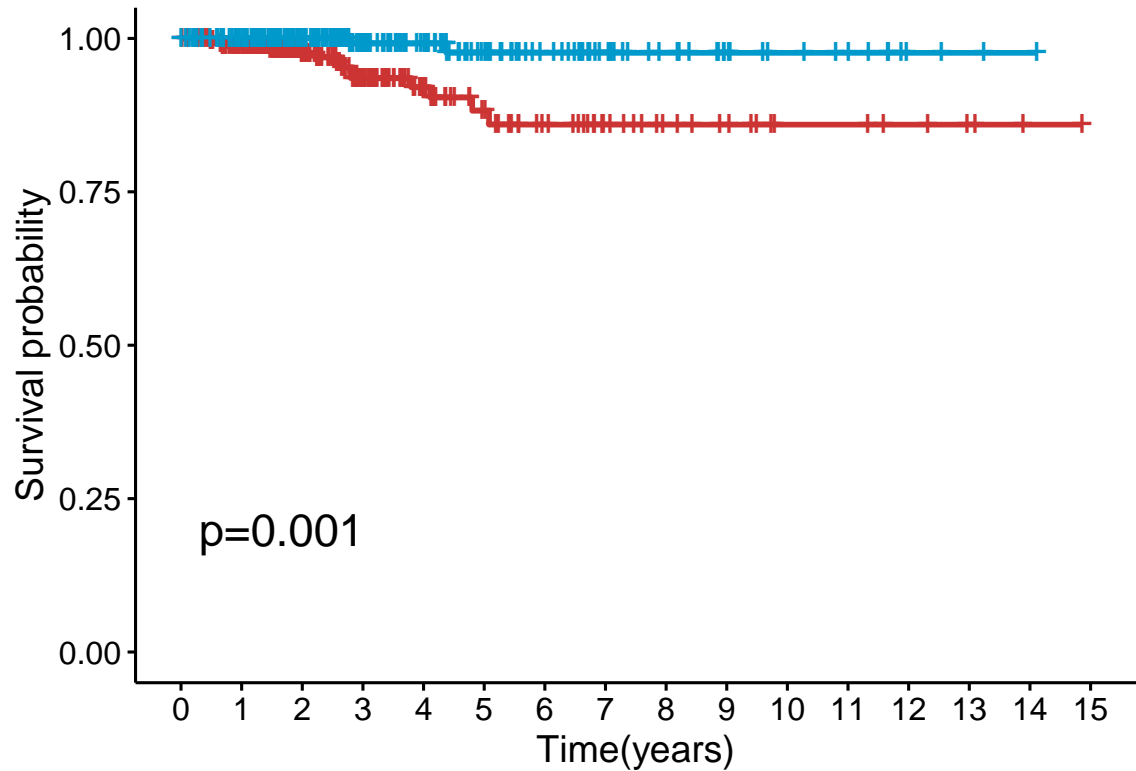

Supplement: raw_data_of_model_comparison.zip [file raw_data_of_model_comparison.zip]

# Ding signature

Risk    + High risk    + Low risk

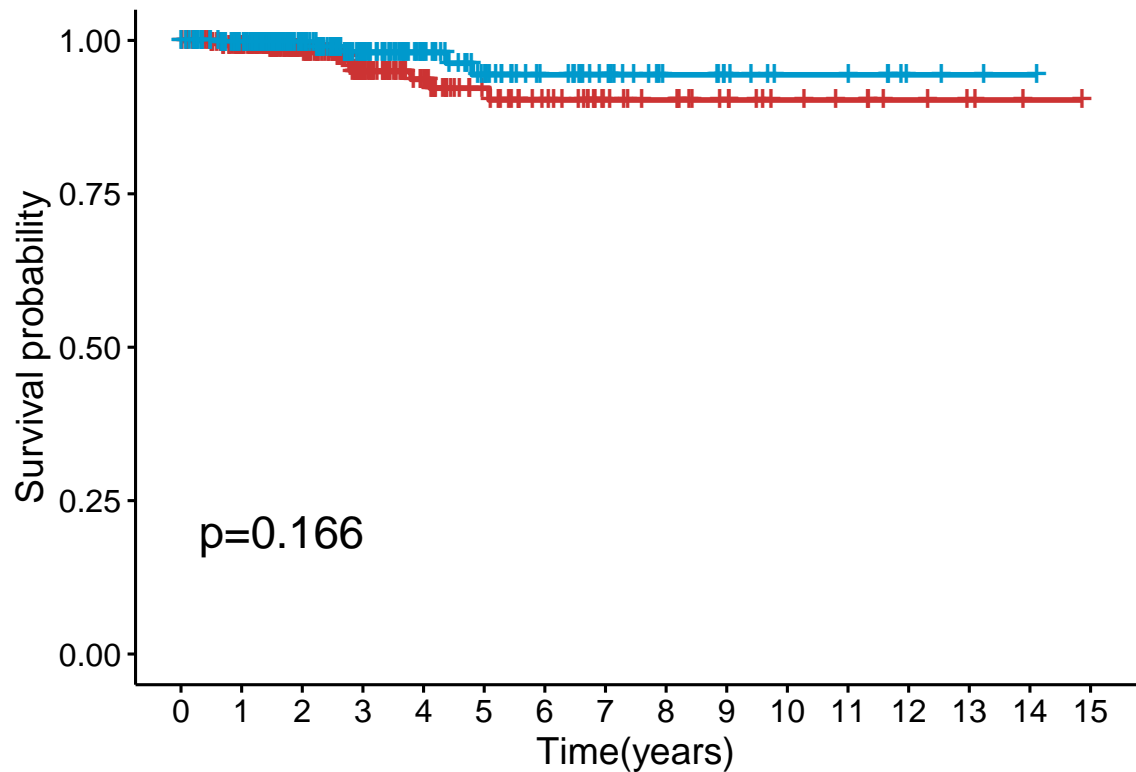

Supplement: raw_data_of_model_comparison.zip [file raw_data_of_model_comparison.zip]
